# Supplementary material for: Homologous Ad26.COV2.S vaccination results in reduced boosting of humoral responses in hybrid immunity, but elicits antibodies of similar magnitude regardless of prior infection
Source: PubMed Central journal article supplement (PMC10055608; doi:10.1101/2023.03.15.23287288), 2023-03-15

A

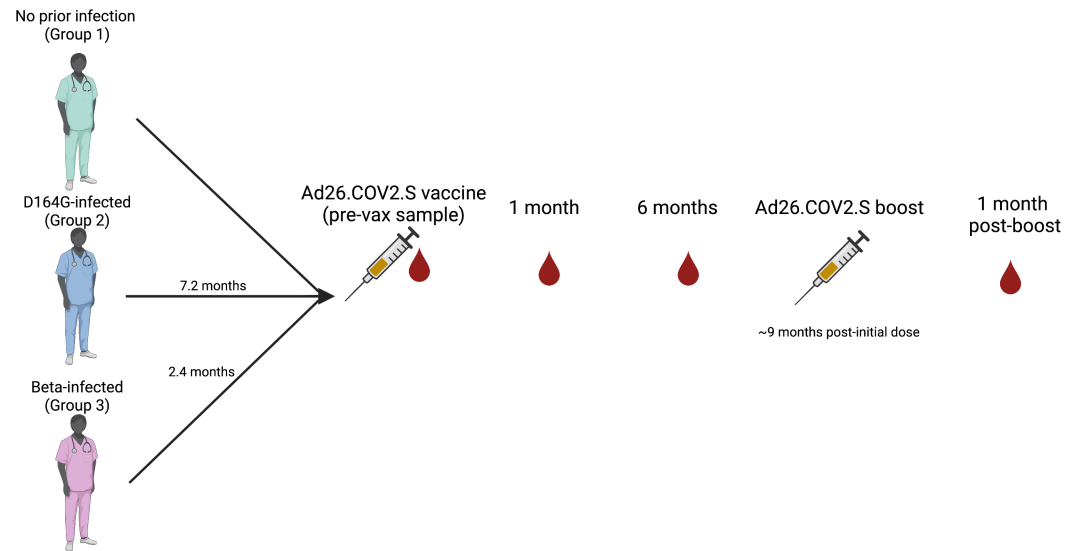

B

|                                               | Longitudinal cohort |                |               |
|-----------------------------------------------|---------------------|----------------|---------------|
|                                               | No prior infection  | D614G infected | Beta infected |
| N                                             | 13                  | 14             | 16            |
| Age (median, IQR)                             | 54 [35-58]          | 35 [29-37]     | 38 [33-48]    |
| Gender (% female)                             | 77%                 | 64%            | 75%           |
| Time after initial vaccine dose (months, IQR) | 5.9 [5-6.3]         | 5.3 [5.1-6.2]  | 5.4 [5.1-6.1] |

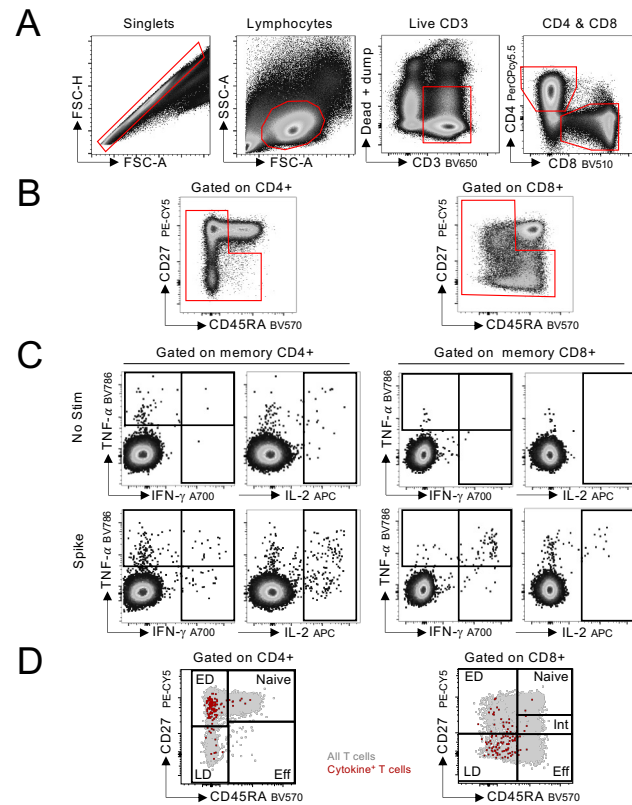

Supplementary Figure 2

## Binding

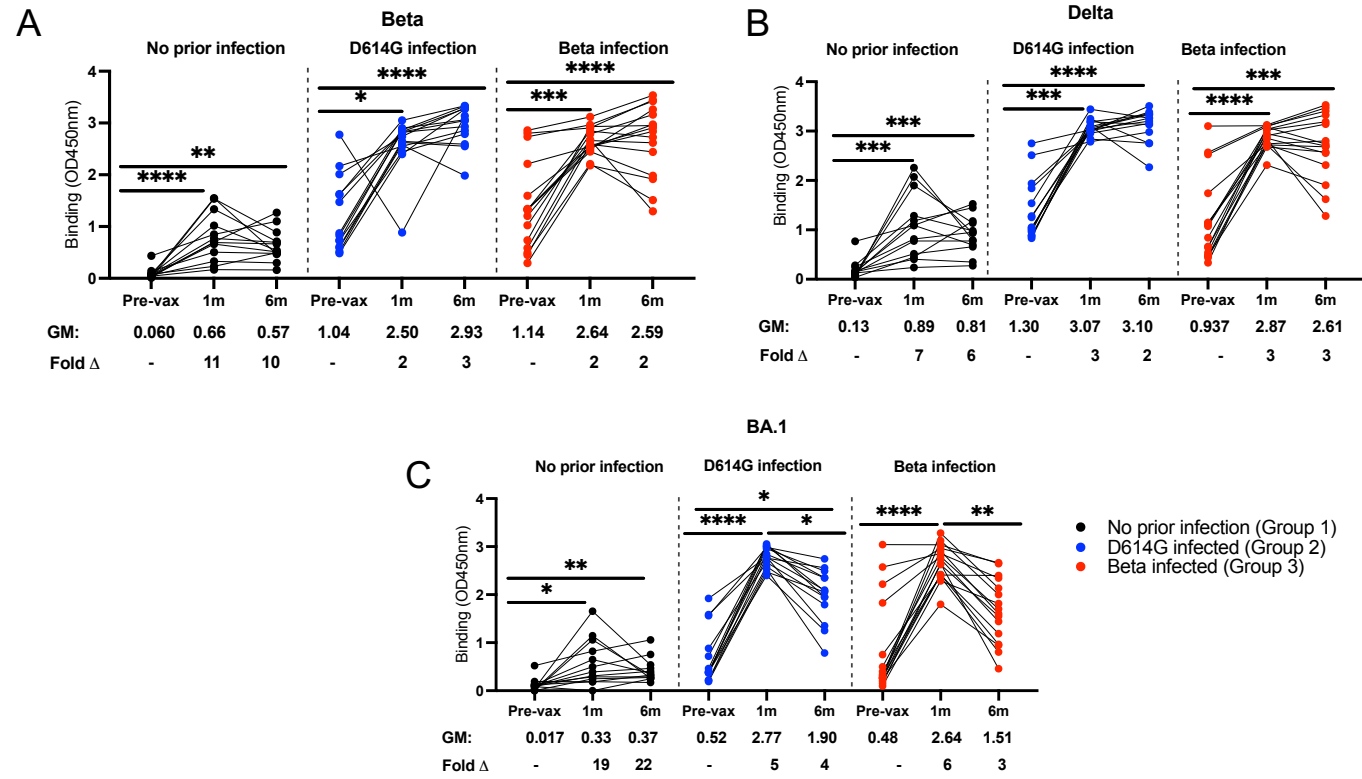

# Antibody dependent cellular cytotoxicity (ADCC)

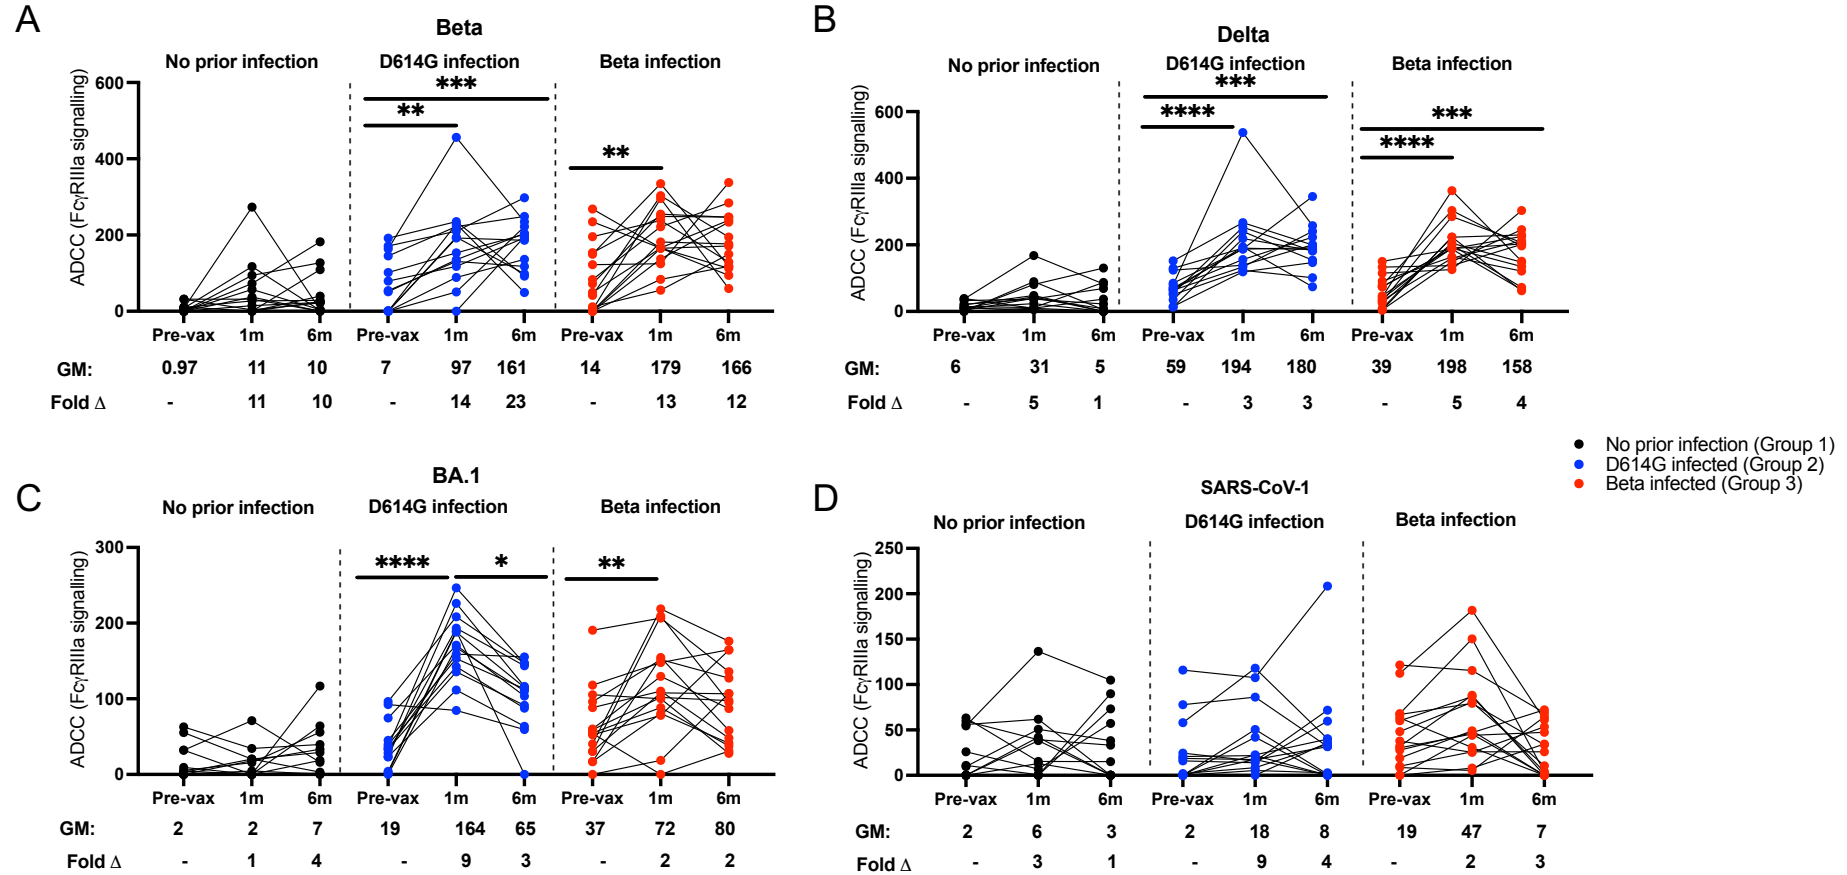

# Neutralization

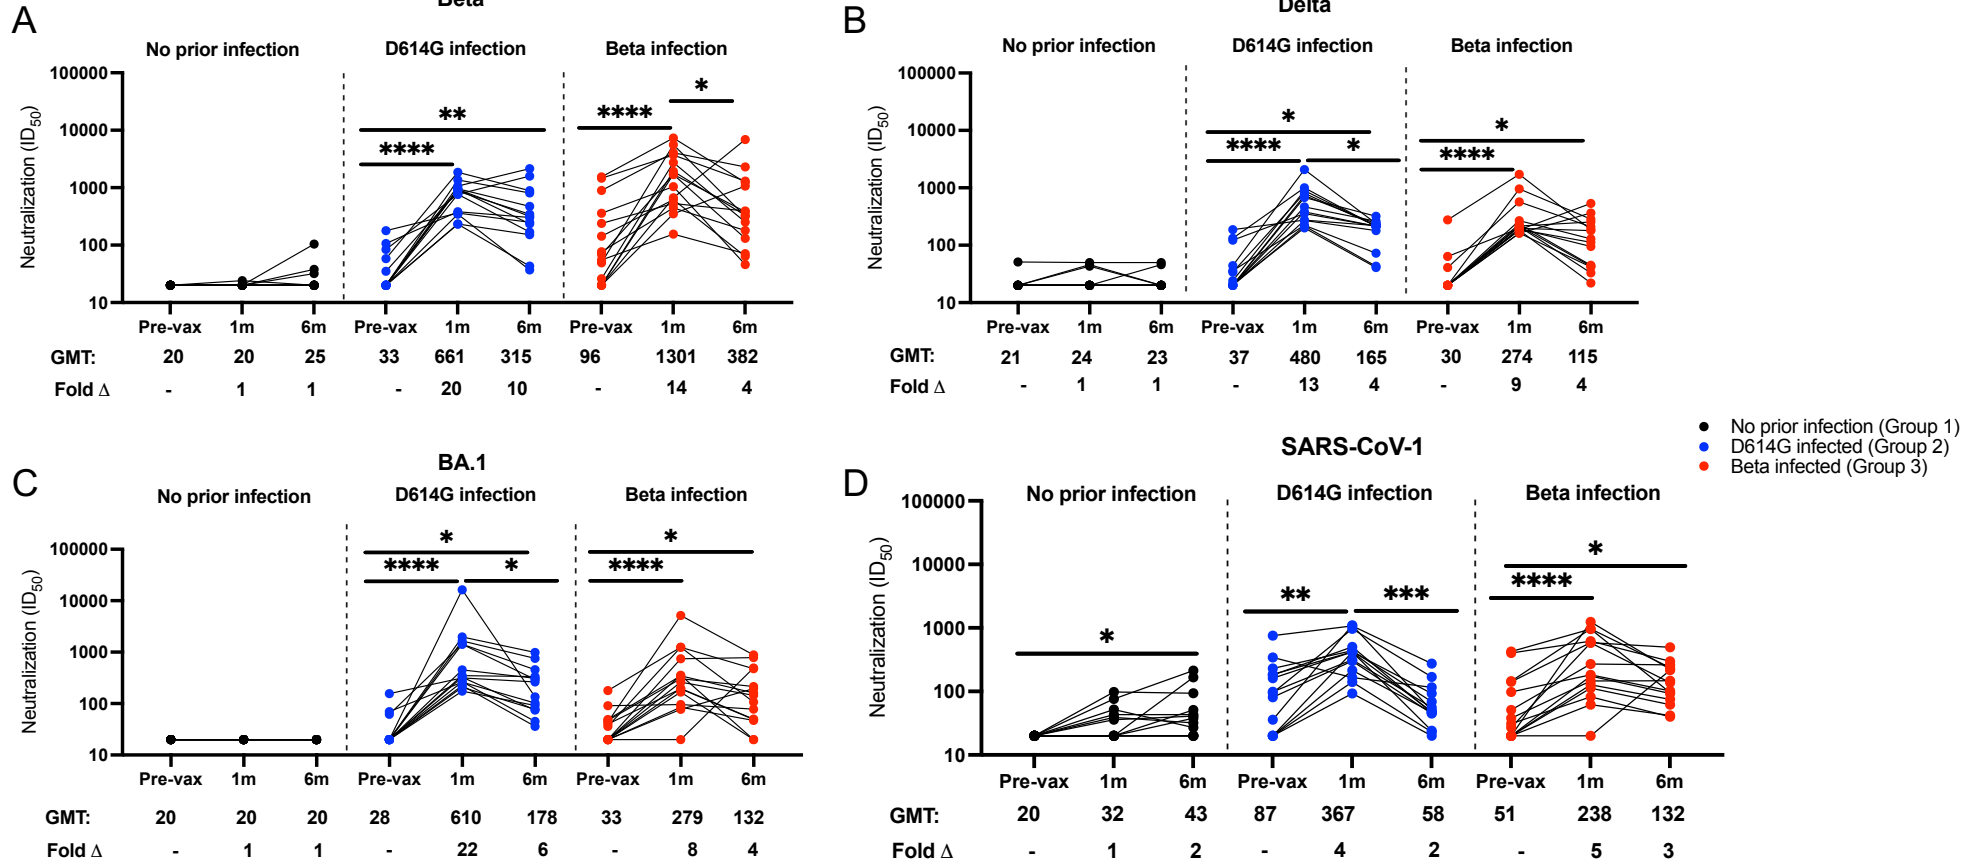

Supplement: media-1.pdf [file media-1.pdf]
